# Supplementary material
Source: publisher figshare collection journal article supplement (https://sage.figshare.com/ndownloader/files/13816946)
Supplement: Supplementary file 1 [file 13816946]

## Supplemental Material

**Table 2.** Details on study design and methodological quality



|             |                                                                      |     |     |     |     |     |     |     |     |     |     |
|-------------|----------------------------------------------------------------------|-----|-----|-----|-----|-----|-----|-----|-----|-----|-----|
| Performance | (10) Were cointerventions avoided or similar?                        | Yes |
| Performance | (11) Was the compliance acceptable in all groups?                    | Yes |
| Detection   | (12) Was the timing of the outcome assessment similar in all groups? | Yes |
| Other       | (13) Are other sources of potential bias unlikely?                   | Yes | Yes | No  | Yes |
